# Supplementary material
Source: Springer Nature journal article supplement (https://www.springermedizin.de/resource/supplementary/12950_2009_135_MOESM1_ESM.pdf/9558034)

# Paw thickness

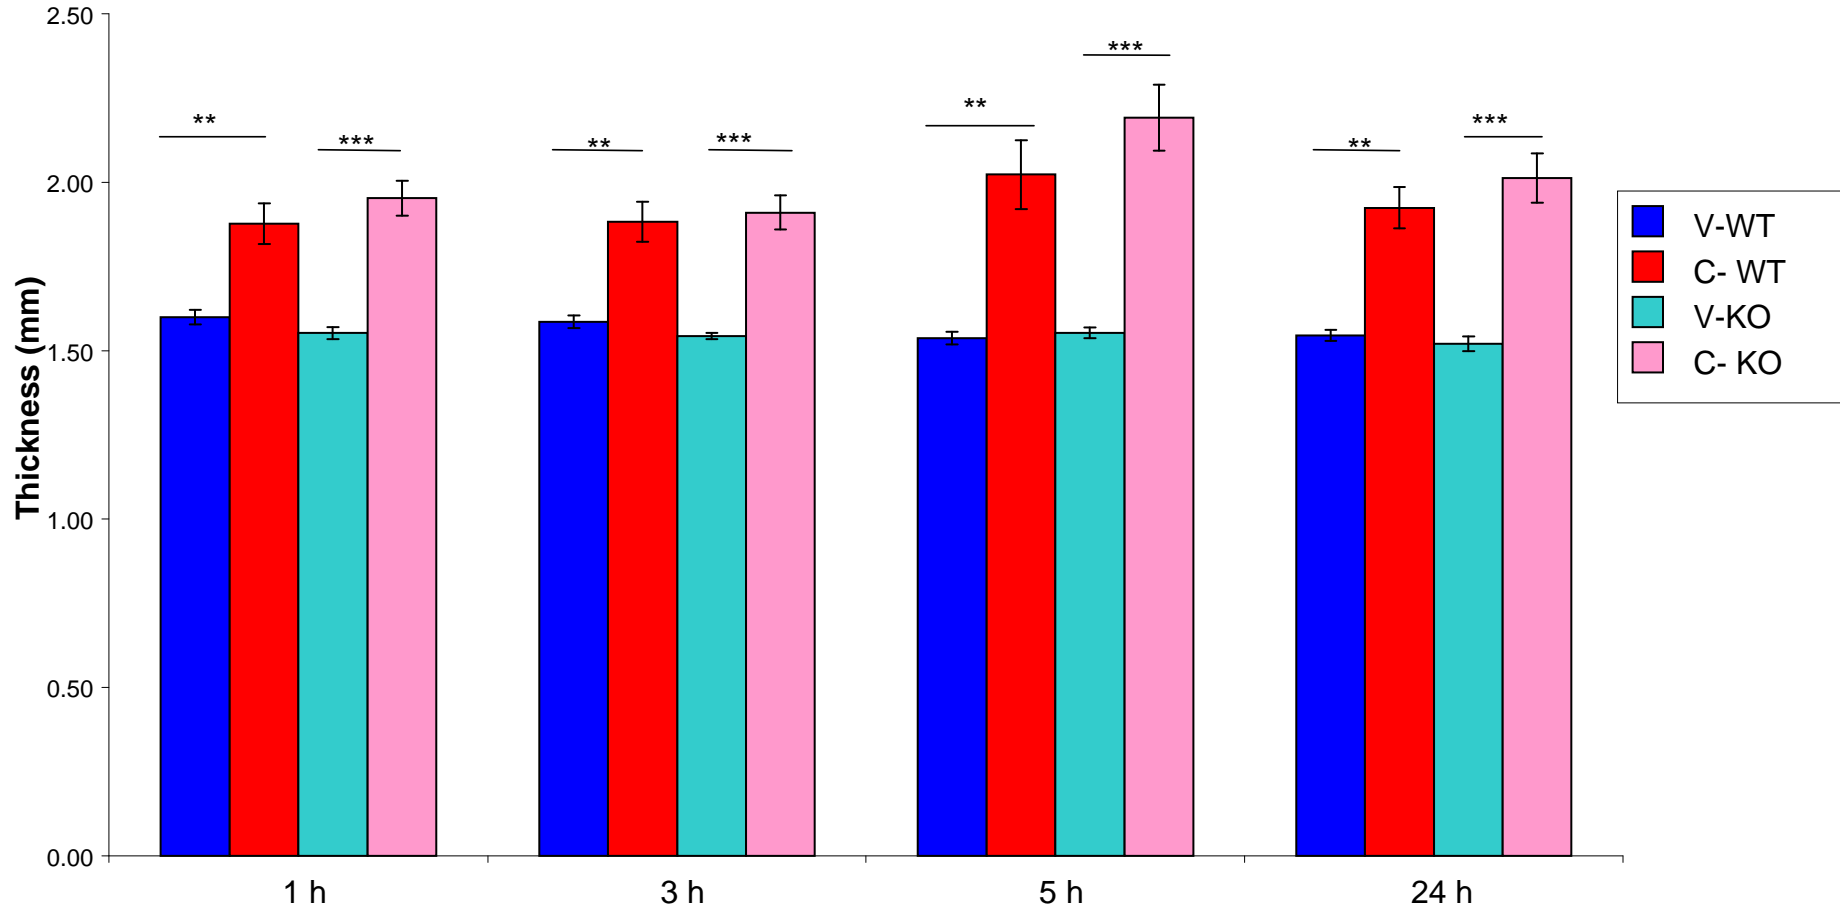

Supplement: MOESM1 [file 9558034]
